# Supplementary material
Source: Research Square preprint supplement (doi:10.21203/rs.3.rs-6234876/v1)
Supplement: Supplementary file 1 [file e3bc9b1b84cf45c95d53e584.docx]

Table 1: Distribution of the studied variables by gender

| Variables | | Sex | | χ2 | *P-value |
| --- | --- | --- | --- | --- | --- |
| Male - n (%) | Female - n (%) |
| Physical activity | Low | 700 (42.30) | 832 (39.85) | 562.37 | < 0.001 |
| Moderate | 496 (29.97) | 1195 (57.23) |
| vigorous | 459 (27.73) | 61 (2.92) |
| Sleep Status | < 7 hours | 391 (23.63) | 501 (23.99) | 10.43 | 0.005 |
| 7-8 hour | 854 (51.60) | 980 (46.93) |
| > 8 hours | 410 (24.77) | 607 (29.07) |
| Sedentary Behavior | < 8 hours | 1526 (92.21) | 1907 (91.33) | 0.92 | 0.33 |
| ≥ 8 hours | 129 (7.79) | 181 (8.67) |
| Fruits and Vegetables | < 400 g | 77 (4.65) | 222 (10.63) | 44.91 | < 0.001 |
| ≥ 400 g | 1578 (95.35) | 1866 (89.37) |
| Fast food | < 23 g | 361 (21.81) | 602 (28.83) | 23.80 | < 0.001 |
| ≥ 23 g | 1294 (78.19) | 1486 (71.17) |

*Based on Chi-square test

Table 2: Summary of latent class model identification and fit statistics

| Num of latent classes | AIC | BIC | G^2 | X^2 | maximum log-likelihood | df | Number of parameters | Number of observations | P-value |
| --- | --- | --- | --- | --- | --- | --- | --- | --- | --- |
| 2 | 23468.6 | 23562.1 | 354.3 | 413.2 | -11719.3 | 56 | 15 | 3743 | <0.001 |
| 3 | 23268.1 | 23411.4 | 137.8 | 144.9 | -11611.1 | 48 | 23 | 3743 | <0.001 |
| 4 | 23221.7 | 23414.8 | 75.4 | 71.74 | -11579.8 | 40 | 31 | 3743 | <0.001 |
| 5 | 23195.3 | 23438.2 | 32.9 | 31.3 | -11558.6 | 32 | 39 | 3743 | <0.001 |
| 6 | 23200.1 | 23492.9 | 21.8 | 19.9 | -11553.1 | 24 | 47 | 3743 | <0.001 |

AIC: Akaike Information Criterion; BIC: Bayesian Information Criterion, df: degrees of freedom

Table 3: Characteristics of the three latent class models identified based on latent class analysis and the probability of membership in each class

| Items | | latent class | | |
| --- | --- | --- | --- | --- |
| class 1 | Class2 | class 3 |
| sufficient sleep insufficient activity | insufficient sleep insufficient activity | sufficient sleep sufficient activity |
| The proportion of the population in each class | | 0.49 | 0.09 | 0.42 |
| Probability of class membership | | 0.57 | 0.05 | 0.38 |
| Item-response probabilities | |  | | |
|  | Low | 0.83 | 0.63 | 0 |
| Physical activity | Moderate | 0.16 | 0.34 | 0.72 |
| vigorous | 0.004 | 0.02 | 0.28 |
| Sleep Status | <7 hour | 0.08 | 0.73 | 0.28 |
| 7-8 hour | 0.46 | 0.27 | 0.56 |
| >8 hour | 0.46 | 0 | 0.16 |
| Sedentary Behavior | <8 hour | 0.93 | 0.44 | 1 |
| ≥8hour | 0.07 | 0.56 | 0 |
| Fruits and Vegetables | <400g | 0.09 | 0.14 | 0.06 |
| ≥400g | 0.91 | 0.86 | 0.94 |
| Fast food | <23 g | 0.28 | 0.3 | 0.23 |
| ≥23 g | 0.72 | 0.7 | 0.77 |

Table 4: Association the relationship between latent class and diabetes in the Dehgolan cohort population using logistic regression

| Variables | | Unadjusted | | Adjusted | |
| --- | --- | --- | --- | --- | --- |
| OR (95% CI) | P-value | OR (95% CI) | P-value |
| Age | 30-45 | 1 | | 1 | |
| 46-60 | 1.93 (1.57 to 2.38) | <0.001 | 1.98 (1.62 to 2.45) | <0.001 |
| >60 | 3.48 (2.67 to 4.53) | <0.001 | 4.02 (3.04 t0 5.31) | <0.001 |
| sex | Male | 1 | | 1 | |
| Female | 1.89 (1.56 to 2.29) | <0.001 | 1.77 (1.44 to 2.17) | <0.001 |
| BMI | Normal | 1 | | 1 | |
| overweight | 2.24 (1.71 to 2.93) | <0.001 | 2.27 (1.72 to 2.90) | <0.001 |
| obesity | 2.54 (1.93 to 3.36) | <0.001 | 2.25 (1.68 to 3.02) | <0.001 |
| Latent class | Class3 | 1 | | 1 | |
| Class1 | 0.82 (0.68 to 0.99) | 0.04 | 1.10 (0.74 to 1.63) | 0.62 |
| Class2 | 1.31 (0.90 to 1.92) | 0.15 | 0.95 (0.78 to 0.63) | 0.62 |

CI: confidence Intervals

Table 5: Association of latent class with cardiovascular disease in the Dehgolan cohort population using logistic regression

| Variables | | Unadjusted | | Adjusted | |
| --- | --- | --- | --- | --- | --- |
| OR (95% CI) | P-value | OR (95% CI) | P-value |
| Age | 30-45 | 1 | | 1 | |
| 46-60 | 3.04 (2.56 to 3.62) | <0.001 | 2.61 (2.12 to 3.21) | <0.001 |
| >60 | 8.28 (6.56 to10.45) | <0.001 | 6.73 (4.97 to 9.13) | <0.001 |
| sex | Male | 1 | | 1 | |
| Female | 1.58 (1.36 to 1.83) | <0.001 | 1.25 (0.93 to 1.68) | 0.13 |
| BMI | Normal | 1 | | 1 | |
| overweight | 1.65 (1.35 to 2.01) | <0.001 | 1.81 (1.45 to 2.26) | <0.001 |
| obesity | 2.60 (2.12 to 3.19) | <0.001 | 2.68 (2.12 to 3.39) | <0.001 |
| diabetes | NO | 1 | _ | 1 | _ |
| YES | 2.89 (2.40 to 3.48) | <0.001 | 2.02 (1.64 to 2.47) | <0.001 |
| Latent class | Class3 | 1 | | 1 | |
| Class1 | 0.69(0.59 0.80) | <0.001 | 0.84 (0.71 to 1.001) | 0.052 |
| Class2 | 2.11(1.56 to 2.86) | <0.001 | 1.80 (1.29 to 2.51) | 0.001 |

CI: confidence Intervals
